# Supplementary material for: Icariin Improves the Viability and Function of Cryopreserved Human Nucleus Pulposus‐Derived Mesenchymal Stem Cells
Source: Hindawi journal article supplement (doi:10.1155/2018/3459612), 2018-01-01
Supplement: f1 [file 3459612.f1.pdf]

**Table.S1**

Characteristics details of the patients enrolled in the study.

| Case no. | Age (years) | Gender | Diagnosis              | Disc level | Pfrrmann grading |
|----------|-------------|--------|------------------------|------------|------------------|
| Case 1   | 43          | F      | Lumbar disc herniation | L5/S1      | IV               |
| Case 2   | 54          | M      | Lumbar disc herniation | L4/5       | IV               |
| Case 3   | 30          | F      | Lumbar disc herniation | L5/S1      | III              |
| Case 4   | 39          | F      | Lumbar disc herniation | L4/5       | IV               |
| Case 5   | 48          | M      | Lumbar disc herniation | L5/S1      | IV               |

**Table.S2**

The details about the use of samples enrolled in the study.

| Case no. | The separate components of the study     |
|----------|------------------------------------------|
| Case 1   | Figure 2A-2B, 3A-3D, 6A-6E, 7A-7D, 8A-8B |
| Case 2   | Figure 2A-B, 3A-3D, 4A-4D, 5A-5B, 6A-6E  |
| Case 3   | Figure 2A-2B, 3A-3D, 4A-4D, 5A-5B, 6A-6E |
| Case 4   | Figure 4A-4D, 5A-5B, 6A-6E, 7A-7D, 8A-8B |
| Case 5   | Figure 3A-3B, 4C-4D, 7A-7D, 8A-8B        |
